# Supplementary material
Source: Elsevier journal article supplement (http://www.jpstyle.ru/track/img/MMC14.pdf)

ООО «Восток Техно-ДВ»  
+79025551746  
[www.jpstyle.ru](http://www.jpstyle.ru)  
[sales@jpstyle.ru](mailto:sales@jpstyle.ru)

Импортная спецтехника в наличии и под заказ  
Запчасти для спецтехники  
Отправка по России

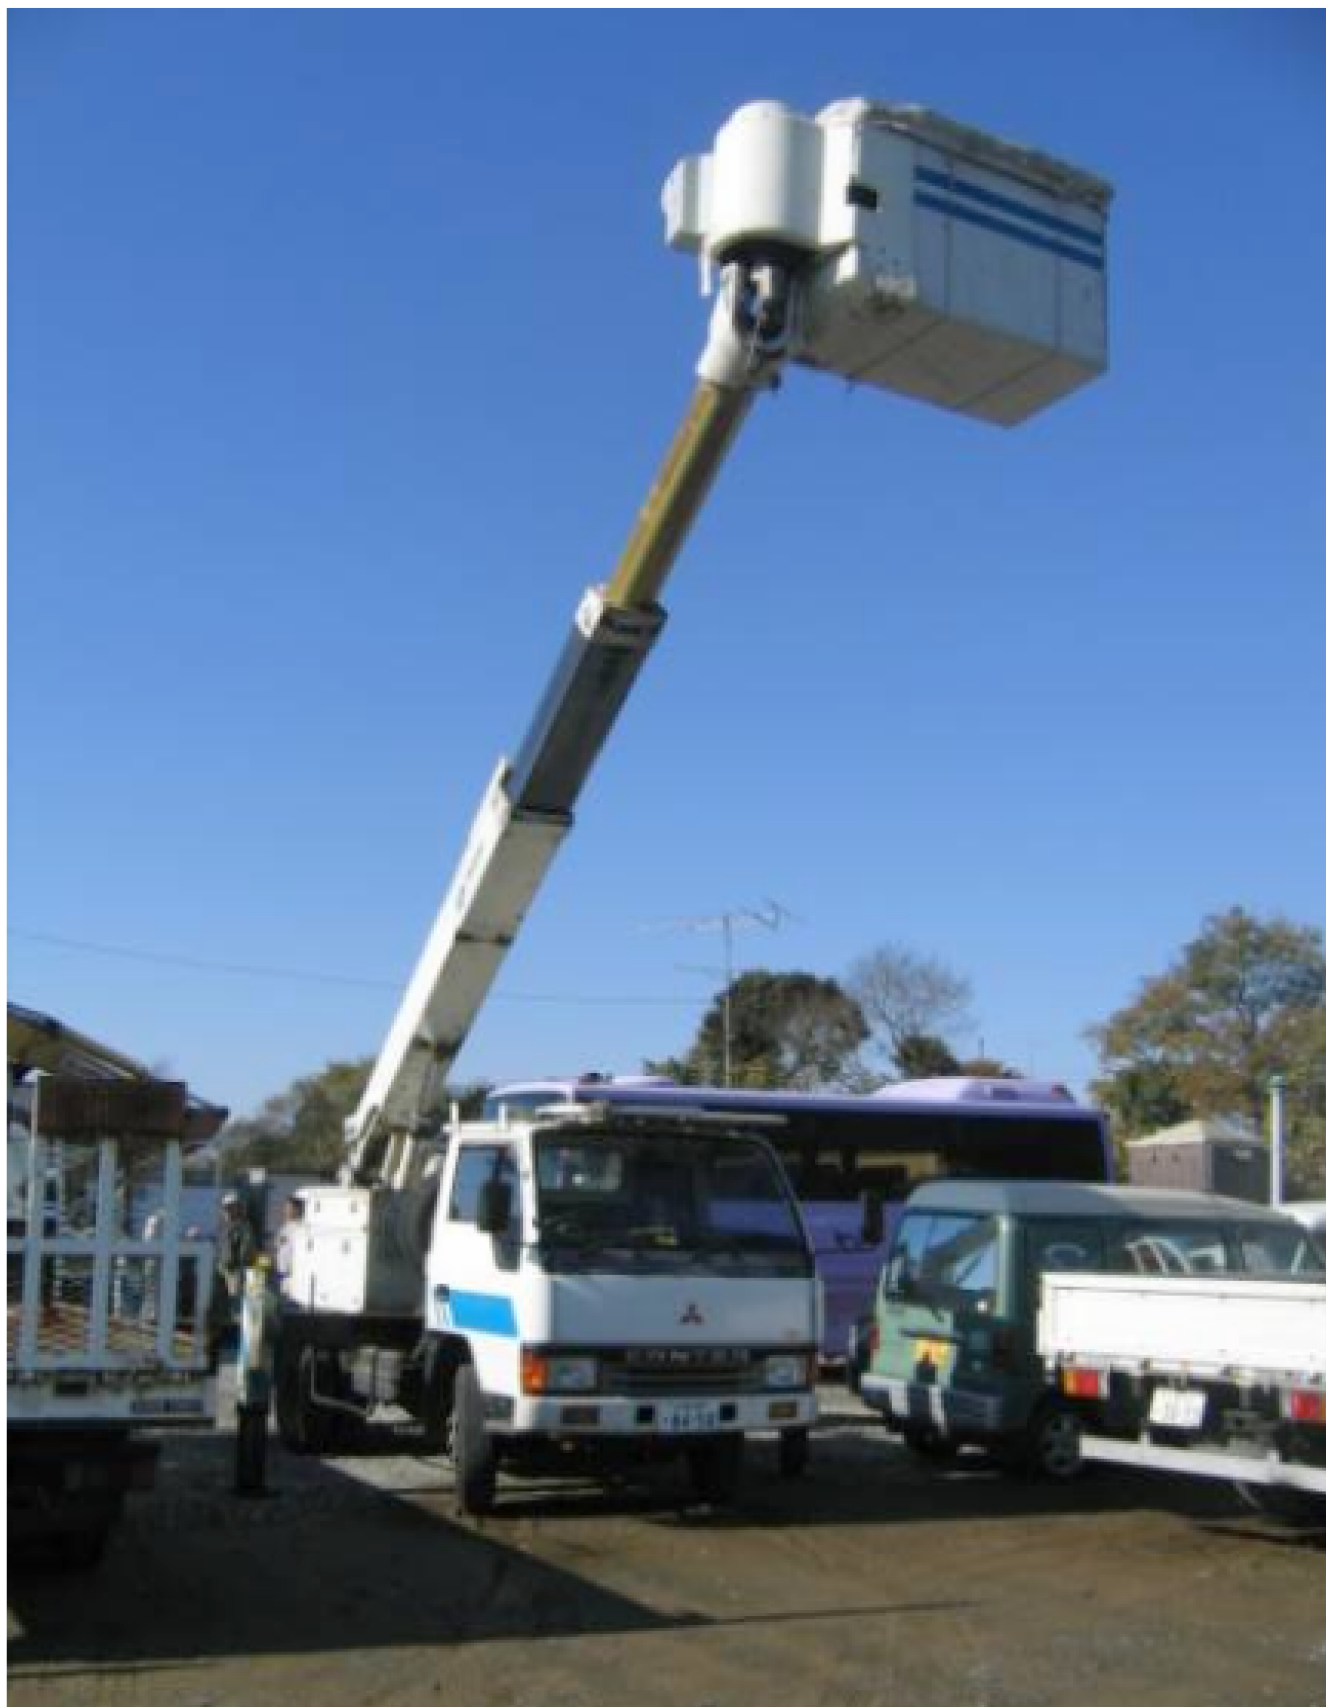

ООО «Восток Техно-ДВ»  
+79025551746  
[www.jpstyle.ru](http://www.jpstyle.ru)  
[sales@jpstyle.ru](mailto:sales@jpstyle.ru)

Импортная спецтехника в наличии и под заказ  
Запчасти для спецтехники  
Отправка по России

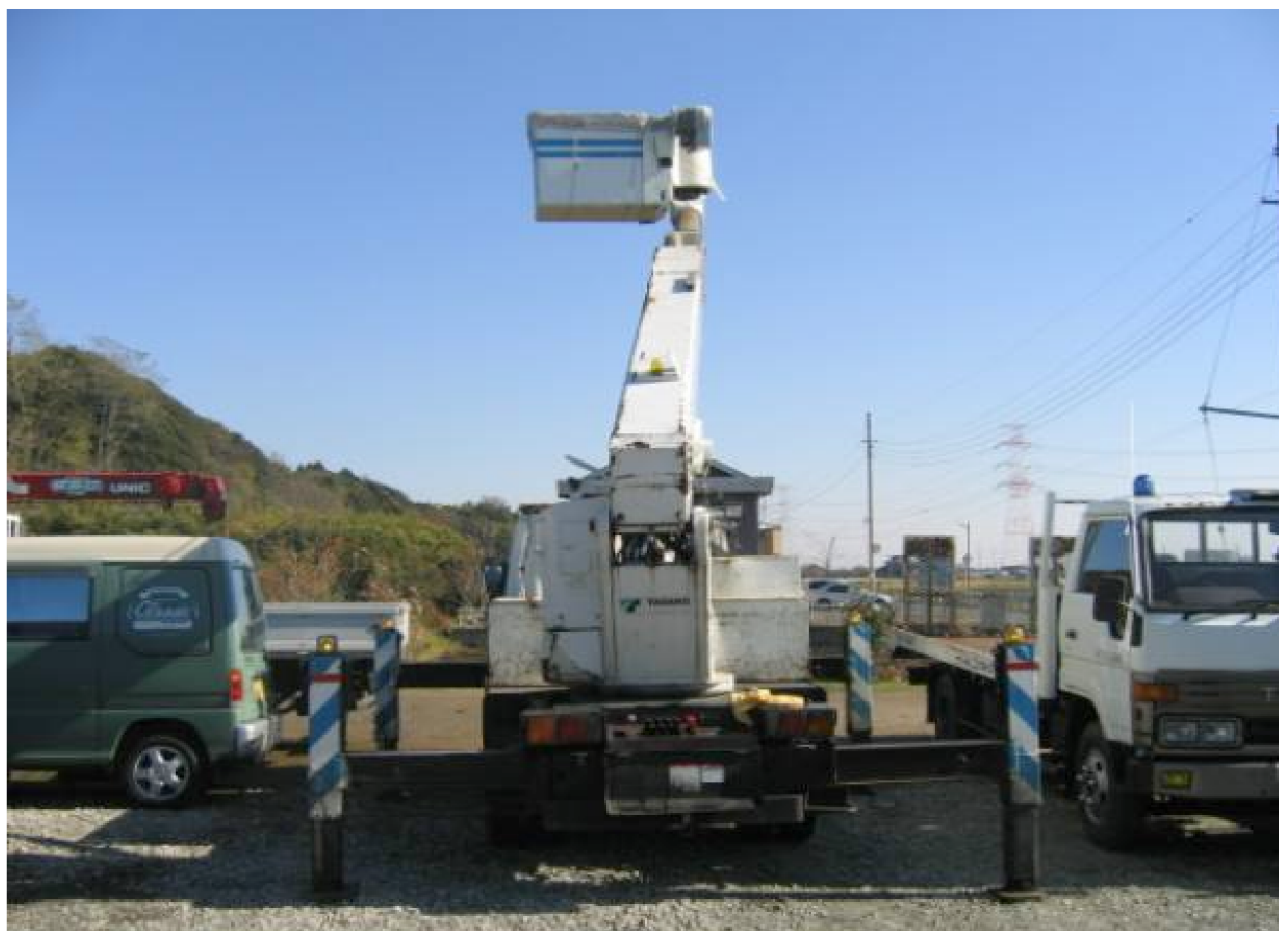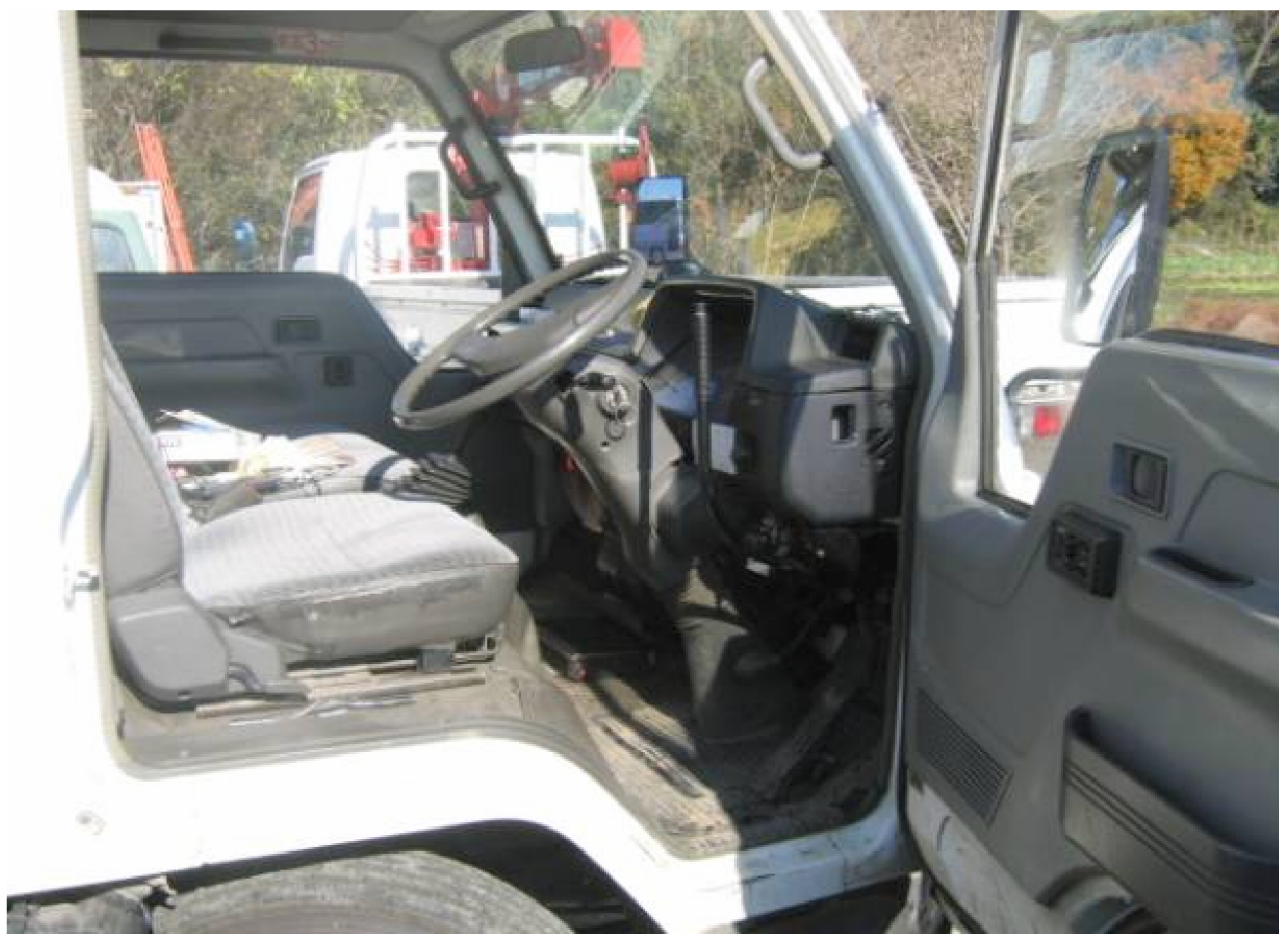

Supplement: MMC14 [file MMC14.pdf]
